# Supplementary material for: Timing of diagnosis, depression and self-harm in adolescents with autism spectrum disorder
Source: PubMed Central journal article supplement (PMC8162135; doi:10.1177/1362361320945540), 2020-08-08
Supplement: hosozawa_suptables-asddep0428.pdf [file hosozawa_suptables-asddep0428.pdf]

**Supplementary Table S1** *Characteristics of the observed sample by the timing of diagnosis for autism*

*spectrum disorder (ASD, N = 11,320)*

|                                                            | No ASD       |      | ASD (n = 396) |      |       |      |        |      |        |      |
|------------------------------------------------------------|--------------|------|---------------|------|-------|------|--------|------|--------|------|
|                                                            | (n = 10,924) |      | Age 5         |      | Age 7 |      | Age 11 |      | Age 14 |      |
|                                                            | n            | %    | n             | %    | n     | %    | n      | %    | n      | %    |
| <b>Sex of the child</b>                                    |              |      |               |      |       |      |        |      |        |      |
| Male                                                       | 5,300        | 50.3 | 54            | 91.2 | 52    | 77.2 | 104    | 79.5 | 91     | 75.0 |
| Female                                                     | 5,624        | 49.8 | 7             | 8.8  | 13    | 22.8 | 34     | 20.5 | 41     | 25.0 |
| <b>Cognitive ability</b>                                   |              |      |               |      |       |      |        |      |        |      |
| Within typical range                                       | 9,861        | 96.2 | 40            | 94.9 | 54    | 88.6 | 109    | 93.3 | 113    | 92.0 |
| Below 1 SD                                                 | 336          | 3.8  | 5             | 5.1  | 6     | 11.4 | 12     | 6.7  | 11     | 8.1  |
| <b>Parental highest education</b>                          |              |      |               |      |       |      |        |      |        |      |
| A-level or above                                           | 5,501        | 44.2 | 29            | 32.7 | 33    | 44.6 | 67     | 44.9 | 59     | 37.4 |
| Below A-level                                              | 4,793        | 55.9 | 32            | 67.3 | 30    | 55.4 | 60     | 55.1 | 65     | 62.7 |
| <b>Low household income</b>                                |              |      |               |      |       |      |        |      |        |      |
| No                                                         | 7,176        | 65.2 | 44            | 58.0 | 36    | 47.9 | 78     | 53.8 | 74     | 47.0 |
| Yes                                                        | 3,085        | 34.8 | 17            | 42.0 | 27    | 52.1 | 49     | 46.2 | 50     | 53.0 |
| <b>Parental depression</b>                                 |              |      |               |      |       |      |        |      |        |      |
| No                                                         | 9,434        | 96.5 | 56            | 93.7 | 56    | 88.5 | 113    | 93.4 | 111    | 89.3 |
| Yes                                                        | 289          | 3.5  | 3             | 6.3  | 6     | 11.5 | 8      | 6.6  | 9      | 10.7 |
| <b>Parent-rated emotional symptoms at age 5, mean (SD)</b> |              |      |               |      |       |      |        |      |        |      |
| Level of ASD-related behaviours, mean (SD)                 | -0.3         | 3.7  | 7.2           | 4.9  | 6.8   | 6.6  | 5.1    | 5.0  | 4.0    | 4.0  |

*Note.* Unweighted numbers and weighted percentages are shown. N varies due to missing data.

**Supplementary Table S2** *Sample bias analysis by diagnostic groups*

|                                                     | Total MCS sample (N = 19,517) <sup>a</sup>   |      |                                                  |      |                       |                                                       |     |                                                    | <i>P</i> <sup>e</sup> |        |        |      |
|-----------------------------------------------------|----------------------------------------------|------|--------------------------------------------------|------|-----------------------|-------------------------------------------------------|-----|----------------------------------------------------|-----------------------|--------|--------|------|
|                                                     | With diagnosis of ASD<br>(n = 624)           |      |                                                  |      | <i>P</i> <sup>e</sup> | Without diagnosis of ASD <sup>b</sup><br>(n = 18,893) |     |                                                    |                       |        |        |      |
|                                                     | Analytic<br>sample <sup>c</sup><br>(n = 396) |      | Non-analytic<br>sample <sup>d</sup><br>(n = 228) |      |                       | Analytic<br>sample <sup>c</sup><br>(n = 10,924)       |     | Non-analytic<br>sample <sup>d</sup><br>(n = 7,969) |                       |        |        |      |
|                                                     | n                                            | %    | n                                                | %    | n                     | %                                                     | N   | %                                                  |                       |        |        |      |
|                                                     | Sex of the child                             |      |                                                  |      |                       |                                                       |     |                                                    |                       | .42    | < .001 |      |
| Male                                                | 301                                          | 75.6 | 180                                              | 78.9 |                       |                                                       |     |                                                    | 5,300                 | 48.7   | 4,238  | 53.0 |
| Female                                              | 95                                           | 24.5 | 48                                               | 21.1 |                       |                                                       |     |                                                    | 5,624                 | 51.3   | 3,731  | 47.0 |
| Cognitive ability                                   |                                              |      |                                                  |      |                       |                                                       |     |                                                    | < .001                | < .001 |        |      |
| Within typical range                                | 316                                          | 92.5 | 118                                              | 80.9 |                       |                                                       |     |                                                    | 9,861                 | 97.6   | 4,083  | 94.5 |
| Below 1 SD                                          | 34                                           | 7.5  | 31                                               | 19.1 |                       |                                                       |     |                                                    | 336                   | 2.4    | 289    | 5.5  |
| Parental highest education                          |                                              |      |                                                  |      |                       |                                                       |     |                                                    | .006                  | < .001 |        |      |
| A-level or above                                    | 188                                          | 53.4 | 86                                               | 40.6 |                       |                                                       |     |                                                    | 5,501                 | 57.3   | 1,820  | 43.2 |
| Below A-level                                       | 187                                          | 46.6 | 118                                              | 59.5 |                       |                                                       |     |                                                    | 4,793                 | 42.7   | 2,729  | 56.8 |
| Low household income                                |                                              |      |                                                  |      |                       |                                                       |     |                                                    | .95                   | < .001 |        |      |
| No                                                  | 232                                          | 65.4 | 123                                              | 65.0 |                       |                                                       |     |                                                    | 7,176                 | 76.7   | 2,613  | 64.3 |
| Yes                                                 | 143                                          | 34.7 | 83                                               | 35.0 |                       |                                                       |     |                                                    | 3,085                 | 23.3   | 1,892  | 35.7 |
| Parental depression                                 |                                              |      |                                                  |      |                       |                                                       |     |                                                    | .94                   | < .001 |        |      |
| No                                                  | 336                                          | 92.6 | 172                                              | 92.4 |                       |                                                       |     |                                                    | 9,434                 | 97.5   | 4,073  | 96.1 |
| Yes                                                 | 26                                           | 7.4  | 18                                               | 7.6  |                       |                                                       |     |                                                    | 289                   | 2.5    | 185    | 3.9  |
| Parent-rated emotional symptoms at age 5, mean (SD) | 2.2                                          | 2.0  | 2.3                                              | 2.1  | .51                   | 1.3                                                   | 1.5 | 1.4                                                | 1.6                   | < .001 |        |      |
| Level of ASD-related behaviours, mean (SD)          | 4.7                                          | 5.4  | 8.3                                              | 6.1  | < .001                | -0.8                                                  | 3.5 | 0.3                                                | 4.1                   | < .001 |        |      |
| Timing of diagnosis for ASD                         |                                              |      |                                                  |      |                       |                                                       |     |                                                    | < .001                |        |        |      |
| Age 5                                               | 61                                           | 14.4 | 72                                               | 31.1 |                       |                                                       |     |                                                    | -                     | -      | -      | -    |
| Age 7                                               | 65                                           | 15.3 | 61                                               | 28.2 |                       |                                                       |     |                                                    | -                     | -      | -      | -    |
| Age 11                                              | 138                                          | 34.6 | 73                                               | 30.9 |                       |                                                       |     |                                                    | -                     | -      | -      | -    |
| Age 14                                              | 132                                          | 35.7 | 22                                               | 9.8  |                       |                                                       |     |                                                    | -                     | -      | -      | -    |

*Note.* Unweighted numbers (n varies due to missing data) and weighted percentages are shown. <sup>a</sup> The number represents children who ever took part in the MCS. <sup>b</sup> Includes 2,963 children with a missing answer for the diagnosis of ASD. <sup>c</sup> Consists of 11,320 children who were included in this study <sup>d</sup> Consists of 8,197 children who were excluded from this study. <sup>e</sup> *P*-value obtained from chi-square test for categorical variables and Wald test for continuous variables.

**Supplementary Table S3** *Differences in mean depressive symptom scores, parent-rated emotional symptoms, and odds of self-harming behaviour by the timing of diagnosis for autism spectrum disorder after adjusting for confounders (Model 1) and further adjusting for the level of ASD-related behaviours (Model 2)*

|                                           | Model 1 Confounder adjusted model <sup>a</sup> |            | Model 2 Further adjusted for level of ASD-related behaviours <sup>b</sup> |            |
|-------------------------------------------|------------------------------------------------|------------|---------------------------------------------------------------------------|------------|
| Depressive symptoms                       | Mean difference                                | 95% CI     | Mean difference                                                           | 95% CI     |
| No ASD                                    | (ref)                                          | -          | (ref)                                                                     | -          |
| Age 5                                     | 0.20                                           | -0.29–0.68 | 0.15                                                                      | -0.34–0.65 |
| Age 7                                     | 0.28                                           | 0.02–0.53  | 0.22                                                                      | -0.04–0.49 |
| Age 11                                    | 0.37                                           | 0.20–0.54  | 0.33                                                                      | 0.15–0.51  |
| Age 14                                    | 0.58                                           | 0.39–0.78  | 0.56                                                                      | 0.37–0.75  |
| P for linear trend                        | < .001                                         | –          | < .001                                                                    |            |
| Self-harming behaviour                    | OR                                             | 95% CI     | OR                                                                        | 95% CI     |
| No ASD                                    | 1 (ref)                                        | -          | 1(ref)                                                                    | -          |
| Age 5                                     | 1.63                                           | 0.66–3.98  | 1.47                                                                      | 0.59–3.64  |
| Age 7                                     | 2.36                                           | 1.10–5.07  | 2.15                                                                      | 1.00–4.61  |
| Age 11                                    | 1.44                                           | 0.79–2.61  | 1.33                                                                      | 0.73–2.44  |
| Age 14                                    | 3.16                                           | 1.84–5.45  | 3.00                                                                      | 1.73–5.21  |
| P for linear trend                        | .006                                           |            | .008                                                                      |            |
| Parent-rated emotional symptoms at age 14 | Mean difference                                | 95% CI     | Mean difference                                                           | 95% CI     |
| No ASD                                    | (ref)                                          | -          | (ref)                                                                     | -          |
| Age 5                                     | 0.77                                           | 0.16–1.38  | 0.08                                                                      | -0.50–0.66 |
| Age 7                                     | 1.66                                           | 0.91–2.41  | 1.06                                                                      | 0.33–1.79  |
| Age 11                                    | 1.92                                           | 1.51–2.34  | 1.43                                                                      | 0.99–1.87  |
| Age 14                                    | 2.23                                           | 1.75–2.71  | 1.89                                                                      | 1.40–2.37  |
| P for linear trend                        | < .001                                         |            | < .001                                                                    |            |

*Note.* ASD: autism spectrum disorder; CI: confidence interval. <sup>a</sup>Adjusted for sex, multiple birth, parental education, household income, parental depression, cognitive ability, and parent-rated emotional symptoms at age 5. <sup>b</sup>A score indicating the level of ASD-related behaviors measured from teacher and parent reports

when the child was around age 5 to 7.

**Supplementary Table S4** *Unmeasured confounding sensitivity analysis for the association between*

*depression and self-harming behaviour and the timing of diagnosis for autism spectrum disorder*

|                               | Fully adjusted observed odds ratios,<br>OR <sub>XY</sub> (95% confidence interval) <sup>a</sup> | Joint minimum strength for<br>unmeasured confounders, OR <sub>UX</sub> and<br>OR <sub>UY</sub> <sup>b</sup> |
|-------------------------------|-------------------------------------------------------------------------------------------------|-------------------------------------------------------------------------------------------------------------|
| <b>Depression</b>             |                                                                                                 |                                                                                                             |
| No ASD                        | 1 (ref)                                                                                         | -                                                                                                           |
| Age 5                         | 1.78 (0.67–4.75)                                                                                | 2.96, 2.96                                                                                                  |
| Age 7                         | 1.56 (0.70–3.49)                                                                                | 2.50, 2.50                                                                                                  |
| Age 11                        | 2.21 (1.27–3.83)                                                                                | 3.84, 3.84                                                                                                  |
| Age 14                        | 3.58 (2.13–5.96)                                                                                | 6.62, 6.62                                                                                                  |
| <b>Self-harming behaviour</b> |                                                                                                 |                                                                                                             |
| No ASD                        | 1 (ref)                                                                                         | -                                                                                                           |
| Age 5                         | 1.63 (0.66–3.98)                                                                                | 2.64, 2.64                                                                                                  |
| Age 7                         | 2.36 (1.09–5.07)                                                                                | 4.16, 4.16                                                                                                  |
| Age 11                        | 1.44 (0.79–2.61)                                                                                | 2.23, 2.23                                                                                                  |
| Age 14                        | 3.16 (1.82–5.45)                                                                                | 5.78, 5.78                                                                                                  |

*Note.* ASD: autism spectrum disorder, OR: odds ratio. <sup>a</sup> Fully adjusted model controlled for sex, multiple birth, parental education, household income, parental depression and cognitive ability and parent-rated emotional symptoms at age 5. <sup>b</sup> OR<sub>XY</sub> is the observed odds for the association between the exposure (X) and the outcome (Y). OR<sub>UX</sub> is the odds between the exposure (X) and the unmeasured confounder (U) and OR<sub>UY</sub> is the odds between the unmeasured confounder (U) and the outcome (Y). The maximum relative amount the unmeasured confounding could reduce an observed odds ratio is given by  $B = \frac{OR_{UX}OR_{UY}}{(OR_{UX}+OR_{UY}-1)}$  and the minimum strength of OR<sub>UX</sub> and OR<sub>UY</sub> to have B explain away the observed odds ratio (OR<sub>XY</sub>) is presented above. In order to determine the required minimum for both OR<sub>UX</sub> and OR<sub>UY</sub>, the two parameters are set equal to each other.
